# Supplementary material
Source: publisher figshare collection journal article supplement (https://acs.figshare.com/ndownloader/files/26042504)
Supplement: Supplementary file 1 [file 26042504]

# High-performance electron-transport-layer-free quantum junction solar cells with improved efficiency exceeding 10 %

*Yuwen Jia,<sup>†, #</sup> Haibin Wang,<sup>‡, #</sup> Yinglin Wang,<sup>\*, †</sup> Naoyuki Shibayama,<sup>§</sup> Takaya Kubo,<sup>‡</sup> Yichun Liu,<sup>†</sup> Xintong Zhang,<sup>\*, †</sup> Hiroshi Segawa<sup>\*, ‡, §</sup>*

<sup>†</sup>Center for Advanced Optoelectronic Functional Materials Research, and Key Laboratory of UV Light-Emitting Materials and Technology of Ministry of Education, Northeast Normal University, Changchun 130024, Jilin. P.R. China

<sup>‡</sup>Research Center for Advanced Science and Technology, The University of Tokyo, 153-8904 Tokyo, Japan

<sup>§</sup>Graduate School Arts and Sciences, The University of Tokyo, 153-8902 Tokyo, Japan

<sup>#</sup> Y.J and H.W. contributed equally.

## Experimental method

**Materials:** Ammonium acetate (97.0%), butylamine (Wako Special Grade, Reagent), zinc acetate dehydrate (99%), N, N-Dimethylformamide (DMF, Super Dehydrate, Reagent), toluene (Super Dehydrate, 99.50%), octane (Wako Special Grade), acetone (Super Dehydrate) and acetonitrile (Super Dehydrate, 99.80%) were purchased from Wako. Lead bromide ( $\text{PbBr}_2$ , for perovskite precursor, 99%), lead iodide ( $\text{PbI}_2$ , for perovskite precursor, 99.99%), 2-Methoxyethanol (GR, >99.0%), 2-Aminoethanol (GR, >99.0%), 1,2-Ethanedithiol (>99.0%), Oleic Acid (OA, >85%) and 1-Octadecene (ODE, >90.0%) were purchased from TCI. Lead oxide ( $\text{PbO}$ , 100.00%) and Hexamethyldisilathiane ( $(\text{TMS})_2\text{S}$ , synthesis Grade) were purchased from Aldrich. Fluorine-doped tin oxide (FTO) glass with a sheet resistance of 10 ohm/square from Nippon sheet glass co. Ltd. was employed as transparent conductive substrate. All the chemicals were not reprocessed.

**Solution phase ligand exchange method:** The synthesis of oleic-acid-capped CQDs was same as previously studies.<sup>1</sup> The ligand-exchanged precursor solution was prepared by dissolved  $\text{PbI}_2$  (0.1 M),  $\text{PbBr}_2$  (0.05 M) and acetate ammonium (0.04M) in 5 ml DMF. Then mixing 5 ml CQDs solution (octane, 10 mg/ml) with the precursor solution. After stirring vigorously, the CQDs was completely transferred from octane to DMF. The ligand-exchanged solution was washed by octane 3 times, and precipitated by toluene and centrifuge. After drying by argon gas flow, the CQDs was dissolved by butylamine of 200 mg/ml.

**Preparation of the CQDSCs:** FTO was ultrasonically cleaned three times by detergent, ultra-pure water and ethanol, respectively. The sol-gel ZnO precursor solution was dissolved zinc

acetate (0.55 g) and ethanol amine (100 µl) in 10 ml methanol. The precursor solution was spin-coated on FTO at 3000 rpm for 30 s, then annealed at 350 °C. The PbS-PbI<sub>2</sub> solution was then spin-coated on the FTO or FTO/ZnO substrate at 1000 rpm for 30 s, following by an annealing on 80 °C hotplate in dry room.<sup>2</sup> P-type CQDs was filmed by layer-by-layer method. 50 mg/ml CQDs solution was spin-coated at 2500 rpm for 15 s. Then 1,2-Ethanedithiol (EDT) acetonitrile solution (0.02 vol%) treated the film for 30s, followed by acetonitrile washing 3 times. Finally, 100 nm Au was deposited as the electrode.

**Ultraviolet photoelectron spectroscopy (UPS)** equipped with He-I source ( $h\nu = 21.22$  eV) (KRATOS Nova, Shimazu Co.) was used to determine the work function and Fermi level. The level of the samples was referred to that of Au which was in electrical contact with a sample. All measurements were performed under the same negative bias of 6 V.

We estimated the Fermi level ( $E_F$ ) and the valence band maximum ( $E_v$ ) of PbS CQDs with respect to vacuum level using UPS (Figure S1a). The conduction band minimum ( $E_c$ ) of PbS CQDs could be approximated through equation 1

$$E_c = E_v - E_g = E_v - E_{g,opt} - 1.786 \frac{e^2}{4\pi\epsilon_0\epsilon_{CQD}R} \quad (1)$$

where  $e$  is elementary charge,  $\epsilon_0$  is vacuum permittivity,  $R$  and  $E_{g,opt}$  are the radius and optical bandgap of CQDs, respectively, and  $\epsilon_{CQD}$  is the optical dielectric constant of CQD core material which in the used as 17.2 according the reported literature.<sup>3</sup>

**Uv-visible near infrared absorption spectrum** was measured by HITACHI U4150.

**space-charge-limited current (SCLC) measurement** was measured by Keithley 2400 source meter with an electron-type device (FTO/ZnO/PbS/Al). The electron mobility ( $\mu_e$ ) can be calculated by

$$J_D = \frac{9\epsilon_{CQD}\epsilon_0\mu V^2}{8L^3}$$

Where  $L$  is the thickness of PbS films (250 nm). And the  $n_{trap}$  can be calculated by

$$n_{trap} = \frac{2\epsilon_{CQD}\epsilon_0 V_{TFL}}{eL^2}$$

The  $V^2$  and  $V_{TFL}$  are shown in SCLC plot (Figure S2).

**Scanning electron microscope** images were captured through HITACHI SU8000.

**Current density–voltage ( $J$ – $V$ )** characteristic was measured by Keithley 2401 source meter under simulated 100 mW/cm<sup>2</sup>, AM1.5G illumination (BUNKOKEIKI Otento-sun VI). The area of illumination was 0.049 cm<sup>2</sup> with a 2.5mm diameter photo mask, and the step of voltage was 5 mV.

**External quantum efficiency (EQE)** was BUNKOKEIKI CEP-2000. The area of illumination was 0.049 cm<sup>2</sup>, and the step of wavelength was 5 nm.

**Light intensity dependency** of  $J_{sc}$  and  $V_{oc}$ . We can analysis the exponential factor ( $\alpha$ ) from  $J_{sc}$  vs light intensity ( $P$ ) test, using the relational expression of  $J_{sc} \propto P^\alpha$ . The ideal factor ( $n$ ) and reverse saturation current density ( $J_0$ ) can be expressed by

$$V_{oc} = \frac{nkT}{q} \ln \left( \frac{J_{sc}}{J_0} \right),$$

where  $k$  is Boltzmann constant,  $T$  is temperature, and  $q$  is elementary charge.

**Mott-schottky measurement** was measured by Modulab XM PhotoEchem station (Solartron Analytical). The frequency was 1000 Hz, and the step of voltage was 5 mV.

The depletion width can be expressed by

$$W_D = \frac{1}{N_p} \sqrt{\frac{2\epsilon\epsilon_0(V_{bi} - V)}{q(\frac{1}{N_p} - \frac{1}{N_n})}}$$

where  $N_p$  and  $N_n$  are doping density of PbS-EDT and PbS-PbI<sub>2</sub>,  $\epsilon_0$  is vacuum dielectric constant,  $\epsilon$  is relative dielectric constant, and  $V_{bi}$  is built in potential.

The doping density of PbS-EDT and PbS-PbI<sub>2</sub>, was measured by the capacitance–voltage ( $C-V$ ) curve (Figure S3). The structure of device was FTO/ZnO/CQD/Au, and the equation was

$$\frac{1}{C^2} = \frac{2(V_{bi} - V)}{A^2 q \epsilon_{CQD} \epsilon_0 N}$$

where the  $A$  was the area of electrode,  $V_{bi}$  was the built-in potential, and  $N$  was the doping density of PbS-PbI<sub>2</sub> ( $N_{\text{PbS-PbI}_2}$ ) and PbS-EDT ( $N_{\text{PbS-EDT}}$ ). The calculated  $N_{\text{PbS-PbI}_2}$  and  $N_{\text{PbS-EDT}}$  are  $1.13 \times 10^{16} \text{ cm}^{-3}$  and  $1.46 \times 10^{16} \text{ cm}^{-3}$ .

**The variation of  $J_{sc}$  and  $V_{oc}$**  as the function of light-soaking time was measured by Keithley 2400 source meter under simulated 100 mW/cm<sup>2</sup>, AM1.5G illumination (Enlitech, SS-F5-3A) in air ambient environment with the humidity of 30 %.

**Table S1.** Previous works of the quantum junction solar cells.

| Ref       | Subject                                                         | Device structure                     | Process                                                                                  | PCE (%) |
|-----------|-----------------------------------------------------------------|--------------------------------------|------------------------------------------------------------------------------------------|---------|
| 4         | First quantum junction solar cells                              | ITO/PbS-OH/PbS-I/Al                  | Layer-by-layer method;<br>Inert atmosphere;<br>Long-time annealing.                      | 5.4     |
| 5         | Ag-doped p-type PbS                                             | ITO/PbS-OH/PbS-I/AZO                 | Layer-by-layer method;<br>Inert atmosphere;<br>hot injection Ag doped procedure.         | 6.1     |
| 6         | Solution-phase passivation of n-type PbS                        | ITO/PbS-OH/PbS-I/AZO/Ag              | Solution-phase passivation;<br>dip-coating;<br>Inert atmosphere;<br>Long-time annealing. | 6.6     |
| 7         | Graded doping structure                                         | ITO/PbS-OH/PbS-Br/<br>PbS-I/AZO/Ag   | Layer-by-layer;<br>Inert atmosphere.                                                     | 7.4     |
| This work | Well-passivated and high-quality PbS QDs by ligand engineering. | FTO/PbS-PbI <sub>2</sub> /PbS-EDT/Au | Solution-phase ligand exchange;<br>layer-by-layer;<br><b>Atmosphere</b>                  | 10.5    |

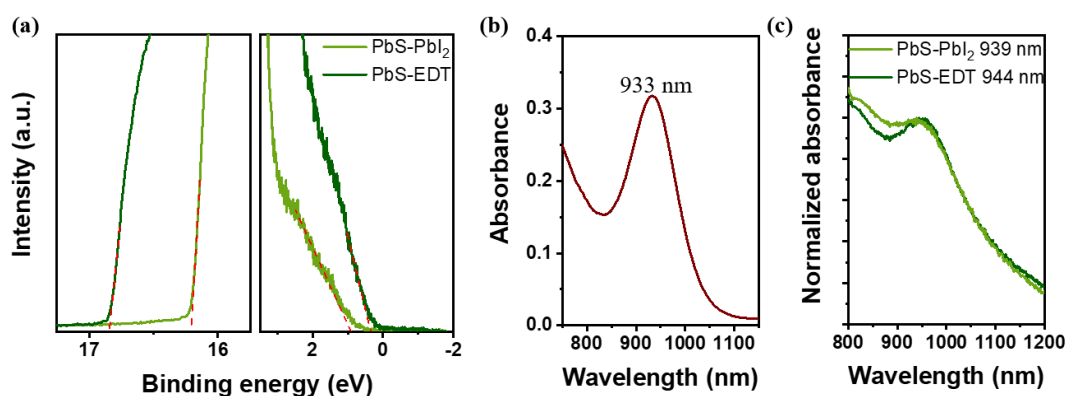

**Figure S1.** (a)UPS spectra of PbS-PbI<sub>2</sub> and PbS-EDT CQDs. The left side is the secondary electron cut-off region, and the right side is the near Fermi edge. (b) Absorbance spectrum of PbS-OA CQD in octane solution. (c) Normalized absorbance spectrum of PbS-PbI<sub>2</sub> and PbS-EDT films.

**Table S2.** Energy levels of PbS-PbI<sub>2</sub> and PbS-EDT CQDs measured by UPS and ultraviolet–visible spectroscopy test.

|                      | $E_c$<br>(eV) | $E_v$<br>(eV) | $E_F$<br>(eV) | $E_{cutoff}$<br>(eV) | $E_F-E_v$<br>(eV) |
|----------------------|---------------|---------------|---------------|----------------------|-------------------|
| PbS-PbI <sub>2</sub> | -4.54         | -5.91         | -5.01         | 16.21                | 0.90              |
| PbS-EDT              | -3.36         | -4.73         | -4.37         | 16.85                | 0.36              |

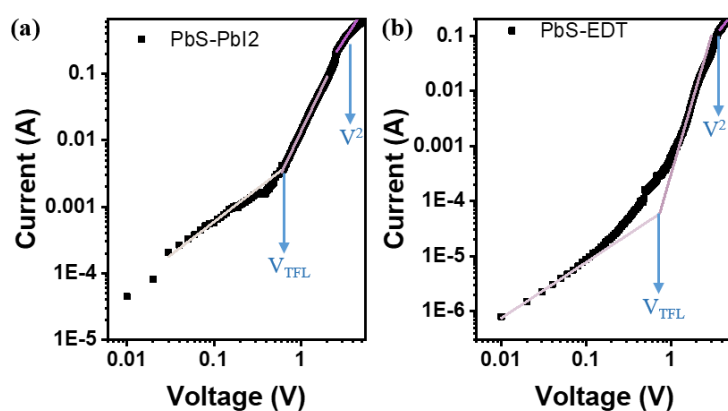

**Figure S2.** Space-charge-limited current (SCLC) plots of (a) PbS-PbI<sub>2</sub> and (b) PbS-EDT film.

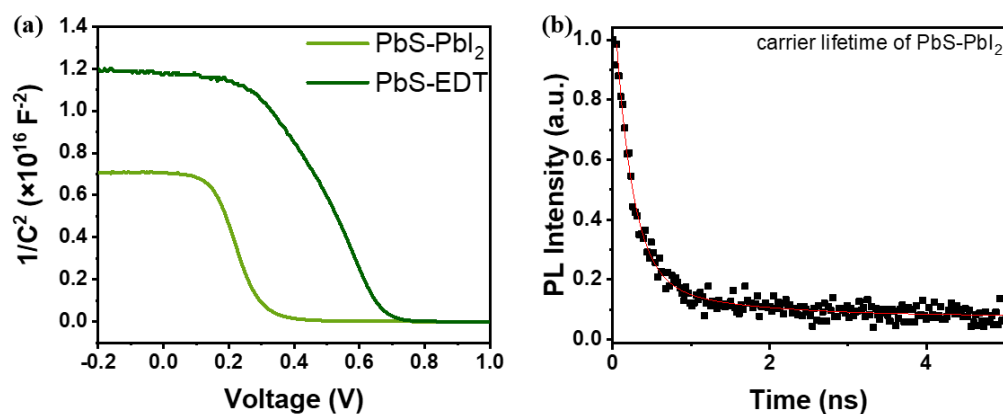

**Figure S3.** (a) Mott–Schottky plot of PbS-PbI<sub>2</sub> and PbS-EDT with structure of FTO/ZnO/PbS/Au. (b) PL decay trace of PbS-PbI<sub>2</sub> film.

**Table S3.** Photoelectrical properties of the PbS-PbI<sub>2</sub> and PbS-EDT films.

|                      | $\mu_e$<br>(cm <sup>2</sup> /V S) | $n_{\text{trap}}$<br>(cm <sup>-3</sup> ) | $N$<br>(cm <sup>-3</sup> ) | $\tau$<br>(ns) |
|----------------------|-----------------------------------|------------------------------------------|----------------------------|----------------|
| PbS-PbI <sub>2</sub> | $2.77 \times 10^{-3}$             | $1.91 \times 10^{16}$                    | $1.13 \times 10^{16}$      | 0.769          |
| PbS-EDT              | $7.76 \times 10^{-4}$             | $2.24 \times 10^{16}$                    | $1.46 \times 10^{16}$      |                |

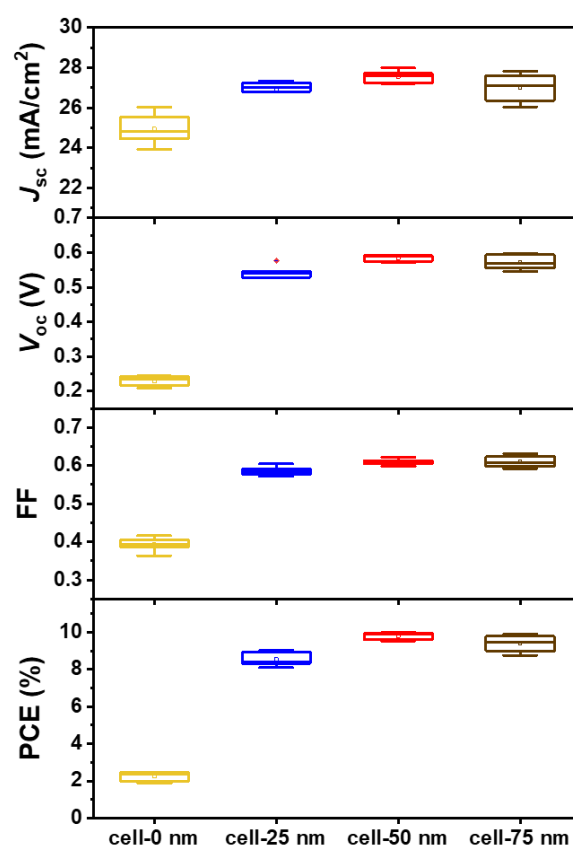

**Figure S4.** Performance parameters of QJSCs with different thickness of PbS-EDT.



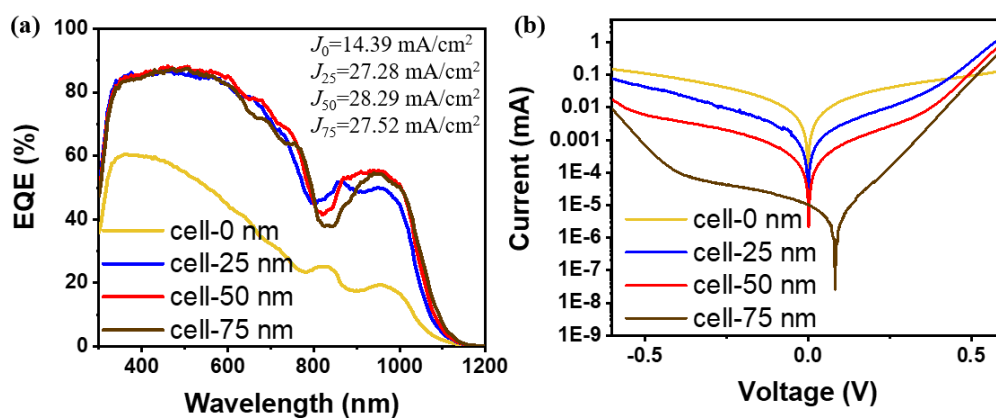

**Figure S5.** (a) EQE curves for devices with different thickness of PbS-PbI<sub>2</sub>. (b)  $J$ - $V$  characteristics in the dark of these devices.

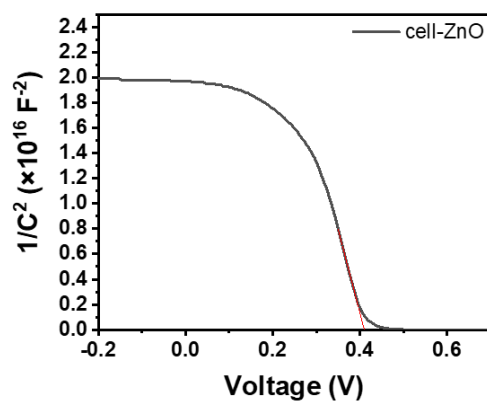

**Figure S6.** Mott-Schottky plot of cell-ZnO devices

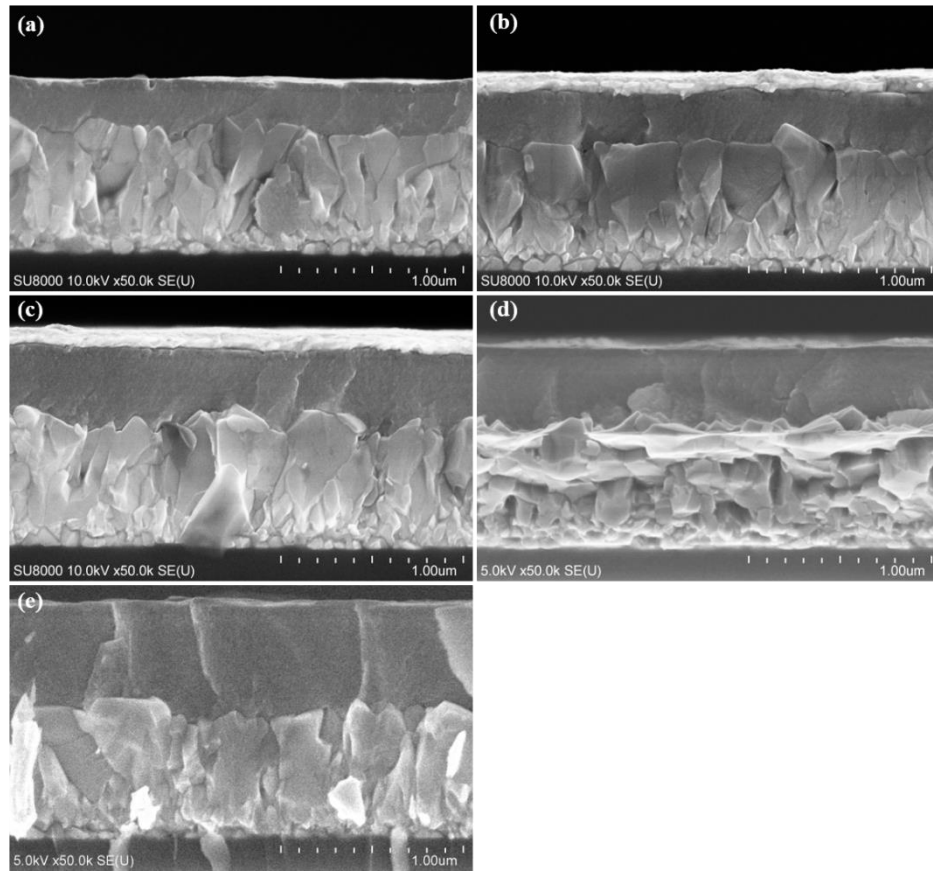

**Figure S7.** Cross-sectional SEM image of MOETL-free QJSCs with different thickness of PbS-PbI<sub>2</sub>.

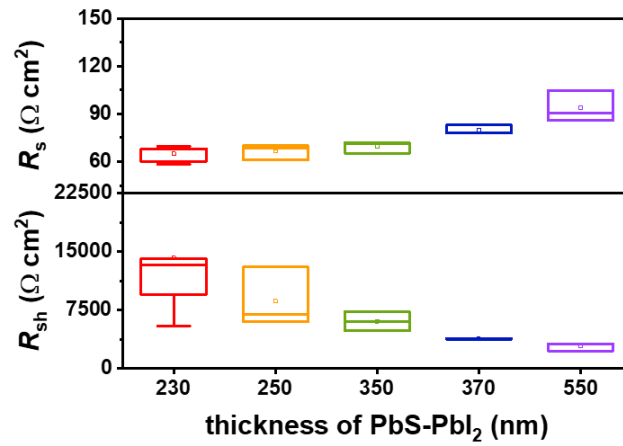

**Figure S8.** Series resistance ( $R_s$ ) and shunt resistance ( $R_{sh}$ ) for devices with different thickness of PbS-PbI<sub>2</sub> calculated by J–V characteristics.

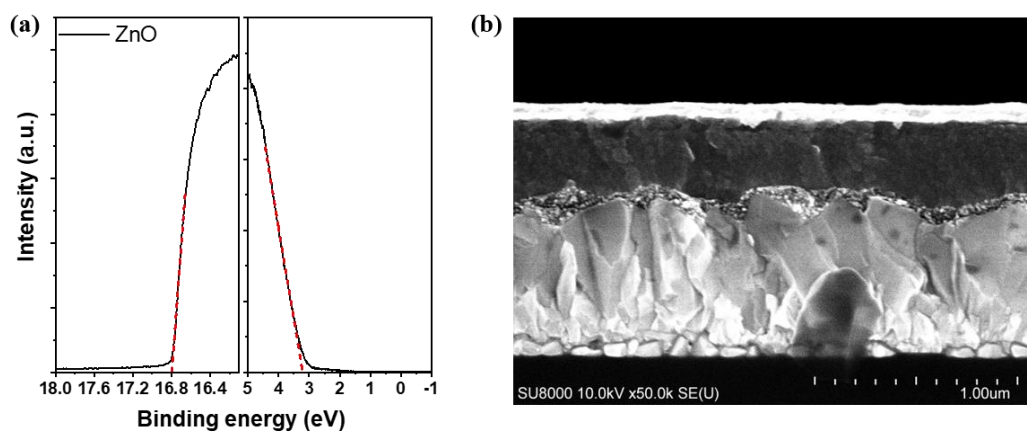

**Figure S9.** (a) Ultraviolet photoelectron spectroscopy (UPS) spectra of ZnO. The left side is the secondary electron cut-off region, and the right side is the near Fermi edge. (b) Cross-sectional SEM image of cell-ZnO device.

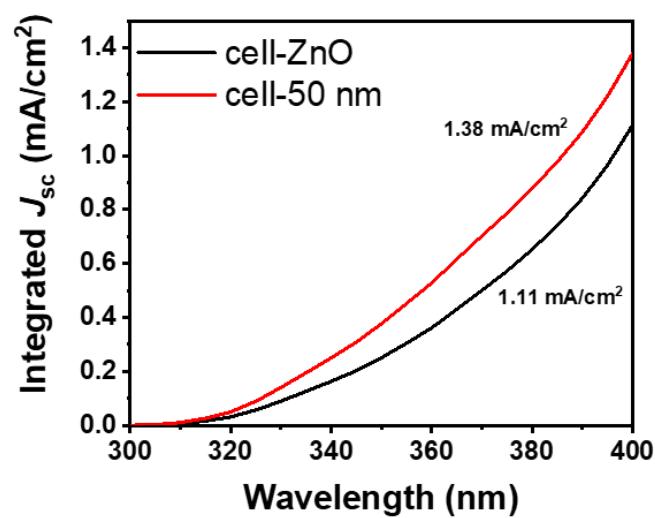

**Figure S10.** Enlarged EQE integrated current density image in the near ultraviolet region.

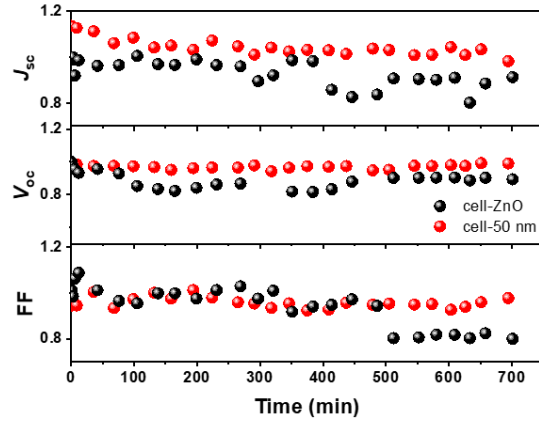

**Figure S11.** The  $J_{sc}$ ,  $V_{oc}$  and FF of cell-ZnO and cell-50 nm as function of time. This test was carried out under the AM1.5G illumination in air ambient environment with the humidity of 30 % without temperature control.

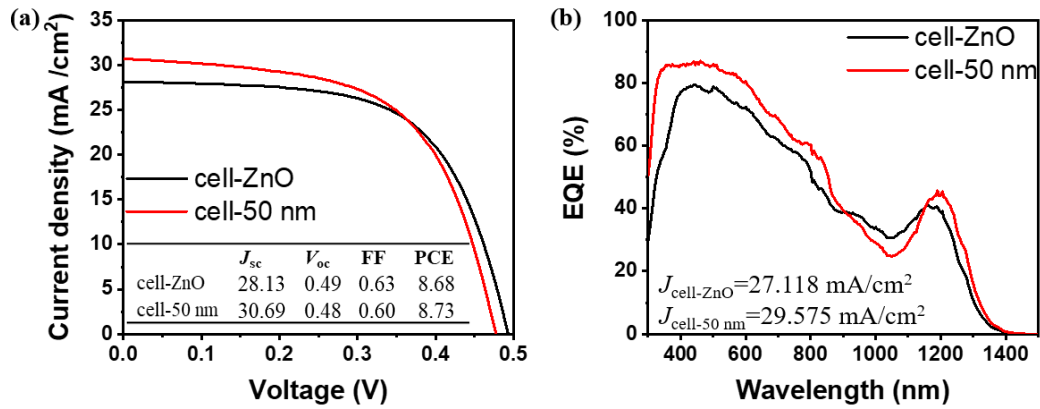

**Figure S12.** (a)  $J$ - $V$  characteristics of cell-ZnO and cell-50 nm devices, which were fabricated using infrared PbS QDs with absorption peak of 1200 nm. (b) EQE curves of these devices.

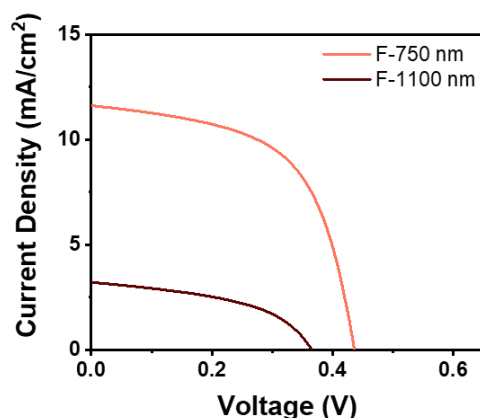

**Figure S13.** 750 and 1100 nm IR-filtered  $J$ – $V$  characteristics of MOETL-free QJSCs, which were fabricated using infrared PbS QDs with absorption peak of 1200 nm.

**Table S4.** Performance parameters of the IR-filtered  $J$ – $V$  characteristics.

|           | $J_{sc}$<br>(mA/cm <sup>2</sup> ) | $V_{oc}$ (V) | FF    | PCE (%) |
|-----------|-----------------------------------|--------------|-------|---------|
| F-750 nm  | 11.62                             | 0.436        | 0.580 | 2.93    |
| F-1100 nm | 3.21                              | 0.366        | 0.472 | 0.55    |

## REFERENCES

- (1) Wang, H.; Kubo, T.; Nakazaki, J.; Segawa, H. Solution-Processed Short-Wave Infrared PbS Colloidal Quantum Dot/ZnO Nanowire Solar Cells Giving High Open-Circuit Voltage. *ACS Energy Lett.* **2017**, 2, 2110-2117.
- (2) Takahashi, A.; Wang, H.; Fukuda, T.; Kamata, N.; Kubo, T.; Segawa, H. Annealing-Temperature Dependent Carrier-Transportation in ZnO/PbS Quantum Dot Solar Cells Fabricated Using Liquid-Phase Ligand Exchange Methods. *Energies* **2020**, 13, 5037.

- (3) Brown, P. R.; Kim, D.; Lunt, R. R.; Zhao, N.; Bawendi, M. G.; Grossman, J. C.; Bulovic, V. Energy Level Modification in Lead Sulfide Quantum Dot Thin Films through Ligand Exchange. *ACS Nano* **2014**, 8, 5863-5872.
- (4) Tang, J.; Liu, H.; Zhitomirsky, D.; Hoogland, S.; Wang, X.; Furukawa, M.; Levina, L.; Sargent, E. H. Quantum Junction Solar Cells. *Nano Lett.* **2012**, 12, 4889-4894.
- (5) Liu, H.; Zhitomirsky, D.; Hoogland, S.; Tang, J.; Kramer, I. J.; Ning, Z.; Sargent, E. H. Systematic Optimization of Quantum Junction Colloidal Quantum Dot Solar Cells. *Appl. Phys. Lett.* **2012**, 101, 151112.
- (6) Ning, Z.; Ren, Y.; Hoogland, S.; Voznyy, O.; Levina, L.; Stadler, P.; Lan, X.; Zhitomirsky, D.; Sargent, E. H. All-Inorganic Colloidal Quantum Dot Photovoltaics Employing Solution-Phase Halide Passivation. *Adv. Mater.* **2012**, 24, 6295-6299.
- (7) Ning, Z.; Zhitomirsky, D.; Adinolfi, V.; Sutherland, B.; Xu, J.; Voznyy, O.; Maraghechi, P.; Lan, X.; Hoogland, S.; Ren, Y.; et al. Graded Doping for Enhanced Colloidal Quantum Dot Photovoltaics. *Adv. Mater.* **2013**, 25, 1719-1723.
